# Supplementary material for: Fullerene translocation through peroxidized lipid membranes
Source: Royal Society of Chemistry journal article supplement (doi:10.1039/d1ra00272d), 2021-01-01
Supplement: d1ra00272d1.pdf [file d1ra00272d1.pdf]

# **Fullerene Translocation through Peroxidized Lipid Membranes**

Gulsah Gul and Nazar Ileri-Ercan\*

Department of Chemical Engineering, Bogazici University, Istanbul, Turkey

**SUPPORTING INFORMATION**

**Table S1.** List of the simulated systems. Here P denotes pristine fullerenes while J denotes janus fullerenes. Third column represents the regular PC number (either DOPC or POPC) while fourth column shows the oxidized number of lipids (either DOBU or POBU) according to the membrane model. Salt concentration is determined as 0.15 M and ion numbers are calculated based on the simulated box volumes. The total simulation time including equilibration exceeds 400  $\mu$ s.

| Membrane      | No of Molecules |            |            |       |                 |                 | Simulation Time ( $\mu$ s) | No |
|---------------|-----------------|------------|------------|-------|-----------------|-----------------|----------------------------|----|
|               | Fullerene       | DOPC/P OPC | DOBU/P OBU | Water | Na <sup>+</sup> | Cl <sup>-</sup> |                            |    |
| <b>DOPC</b>   | no              | 512        | -          | 12312 | 204             | 204             | 10                         | 1  |
|               | 1P              | 512        | -          | 12312 | 204             | 204             | 10                         | 2  |
|               | 1J              | 512        | -          | 12312 | 204             | 204             | 10                         | 3  |
|               | 10P             | 512        | -          | 12312 | 204             | 204             | 10                         | 4  |
|               | 10J             | 512        | -          | 12312 | 204             | 204             | 10                         | 5  |
| <b>DOBU30</b> | no              | 358        | 154        | 12312 | 208             | 208             | 10                         | 6  |
|               | 1P              | 358        | 154        | 12312 | 208             | 208             | 10                         | 7  |
|               | 1J              | 358        | 154        | 12312 | 208             | 208             | 10                         | 8  |
|               | 10P             | 358        | 154        | 12312 | 208             | 208             | 10                         | 9  |
|               | 10J             | 358        | 154        | 12312 | 208             | 208             | 10                         | 10 |
| <b>DOBU70</b> | no              | 154        | 358        | 12312 | 210             | 210             | 10                         | 11 |
|               | 1P              | 154        | 358        | 12312 | 210             | 210             | 10                         | 12 |
|               | 1J              | 154        | 358        | 12312 | 210             | 210             | 10                         | 13 |
|               | 10P             | 154        | 358        | 12312 | 210             | 210             | 10                         | 14 |
|               | 10J             | 154        | 358        | 12312 | 210             | 210             | 10                         | 15 |
| <b>DOBU</b>   | no              | -          | 512        | 12312 | 212             | 212             | 10                         | 16 |
|               | 1P              | -          | 512        | 12312 | 212             | 212             | 10                         | 17 |
|               | 1J              | -          | 512        | 12312 | 212             | 212             | 10                         | 18 |
|               | 10P             | -          | 512        | 12312 | 212             | 212             | 10                         | 19 |
|               | 10J             | -          | 512        | 12312 | 212             | 212             | 10                         | 20 |
| <b>POPC</b>   | no              | 512        | -          | 12312 | 200             | 200             | 10                         | 21 |
|               | 1P              | 512        | -          | 12312 | 200             | 200             | 10                         | 22 |

|               |     |     |     |       |     |     |    |    |
|---------------|-----|-----|-----|-------|-----|-----|----|----|
|               | 1J  | 512 | -   | 12312 | 200 | 200 | 10 | 23 |
|               | 10P | 512 | -   | 12312 | 200 | 200 | 10 | 24 |
|               | 10J | 512 | -   | 12312 | 200 | 200 | 10 | 25 |
| <b>POBU30</b> | no  | 358 | 154 | 12312 | 201 | 201 | 10 | 26 |
|               | 1P  | 358 | 154 | 12312 | 201 | 201 | 10 | 27 |
|               | 1J  | 358 | 154 | 12312 | 201 | 201 | 10 | 28 |
|               | 10P | 358 | 154 | 12312 | 201 | 201 | 10 | 29 |
|               | 10J | 358 | 154 | 12312 | 201 | 201 | 10 | 30 |
| <b>POBU70</b> | no  | 154 | 358 | 12312 | 202 | 202 | 10 | 31 |
|               | 1P  | 154 | 358 | 12312 | 202 | 202 | 10 | 32 |
|               | 1J  | 154 | 358 | 12312 | 202 | 202 | 10 | 33 |
|               | 10P | 154 | 358 | 12312 | 202 | 202 | 10 | 34 |
|               | 10J | 154 | 358 | 12312 | 202 | 202 | 10 | 35 |
| <b>POBU</b>   | no  | -   | 512 | 12312 | 204 | 204 | 10 | 36 |
|               | 1P  | -   | 512 | 12312 | 204 | 204 | 10 | 37 |
|               | 1J  | -   | 512 | 12312 | 204 | 204 | 10 | 38 |
|               | 10P | -   | 512 | 12312 | 204 | 204 | 10 | 39 |
|               | 10J | -   | 512 | 12312 | 204 | 204 | 10 | 40 |



**Figure S1.** Density distribution profiles of lipid head (NC3 & PO4 beads), linker (GL1 & GL2 beads), and tail groups together with water, ion and pristine fullerenes (enlarged in insets), **(a-d)** for DOPC and its oxidized forms, **(e-h)** for POPC and its oxidized forms at fullerene to lipid ratio of  $F/L = 1/512$ .

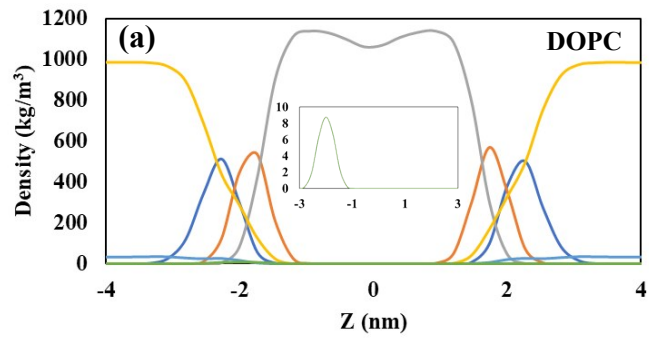

— Head — Linker — Tail — Water — Ion — Janus

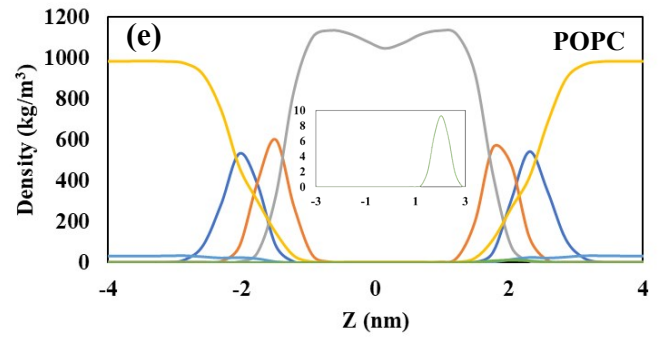

— Head — Linker — Tail — Water — Ion — Janus

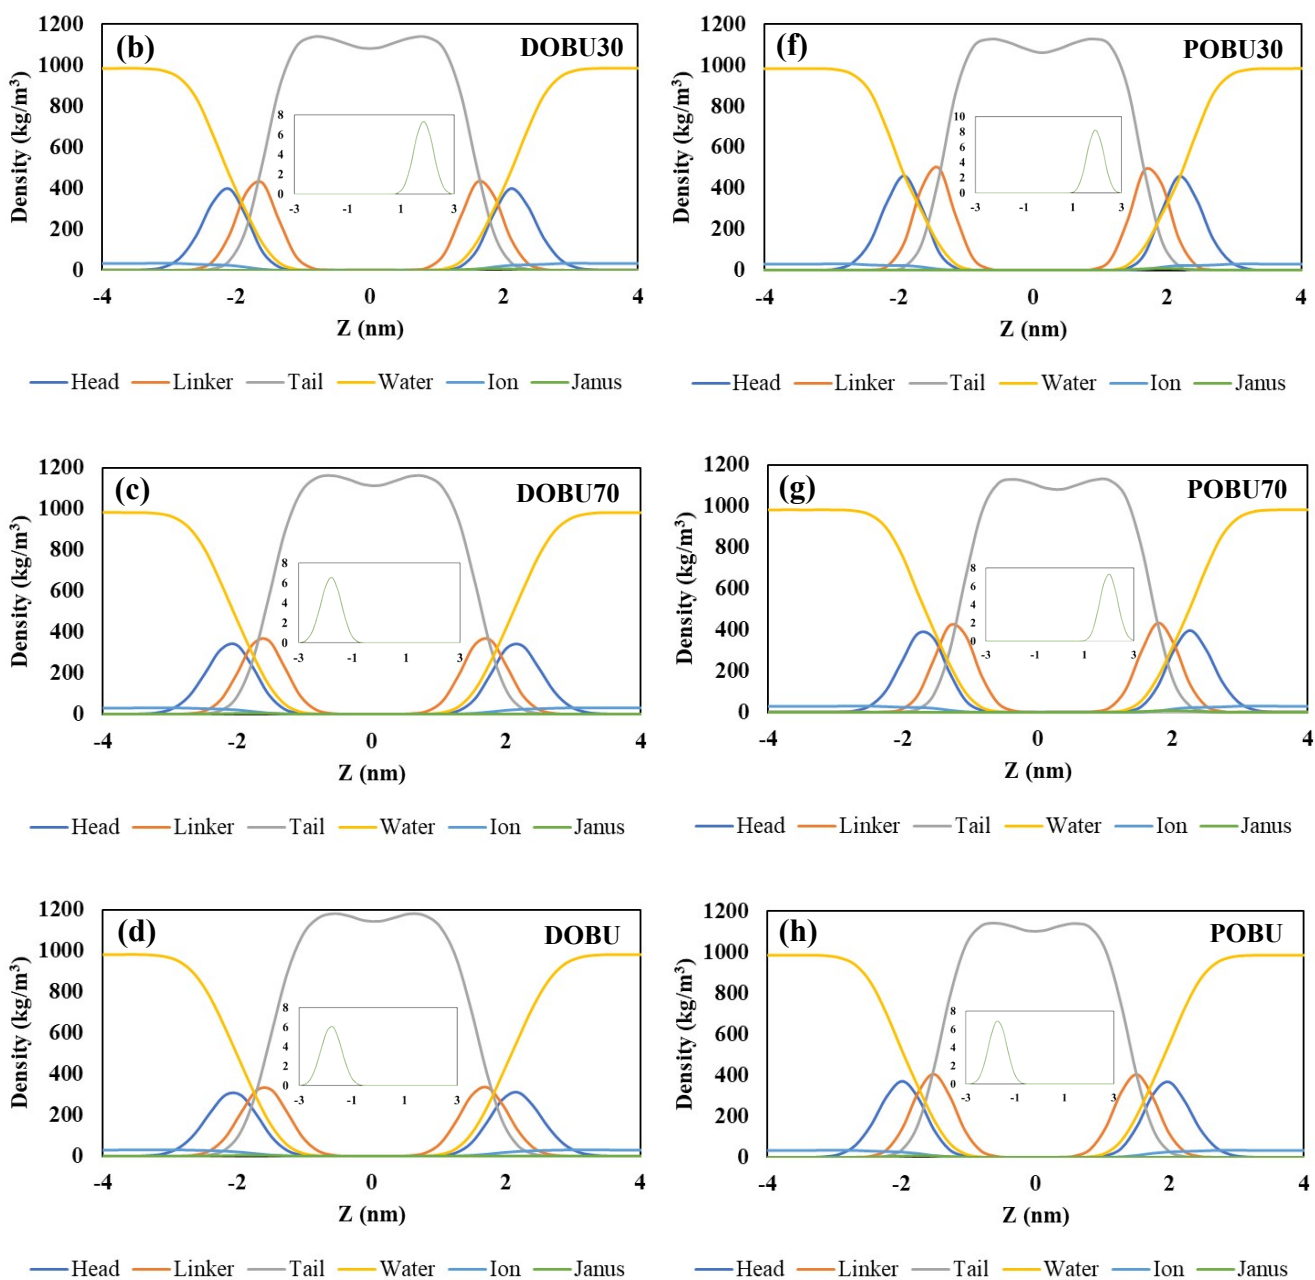

**Figure S2.** Density distribution profiles of lipid head (NC3 & PO4 beads), linker (GL1 & GL2 beads), and tail groups together with water, ion and janus fullerenes (enlarged in insets), **(a-d)** for DOPC and its oxidized forms, **(e-h)** for POPC and its oxidized forms at fullerene to lipid ratio of  $F/L = 1/512$ .

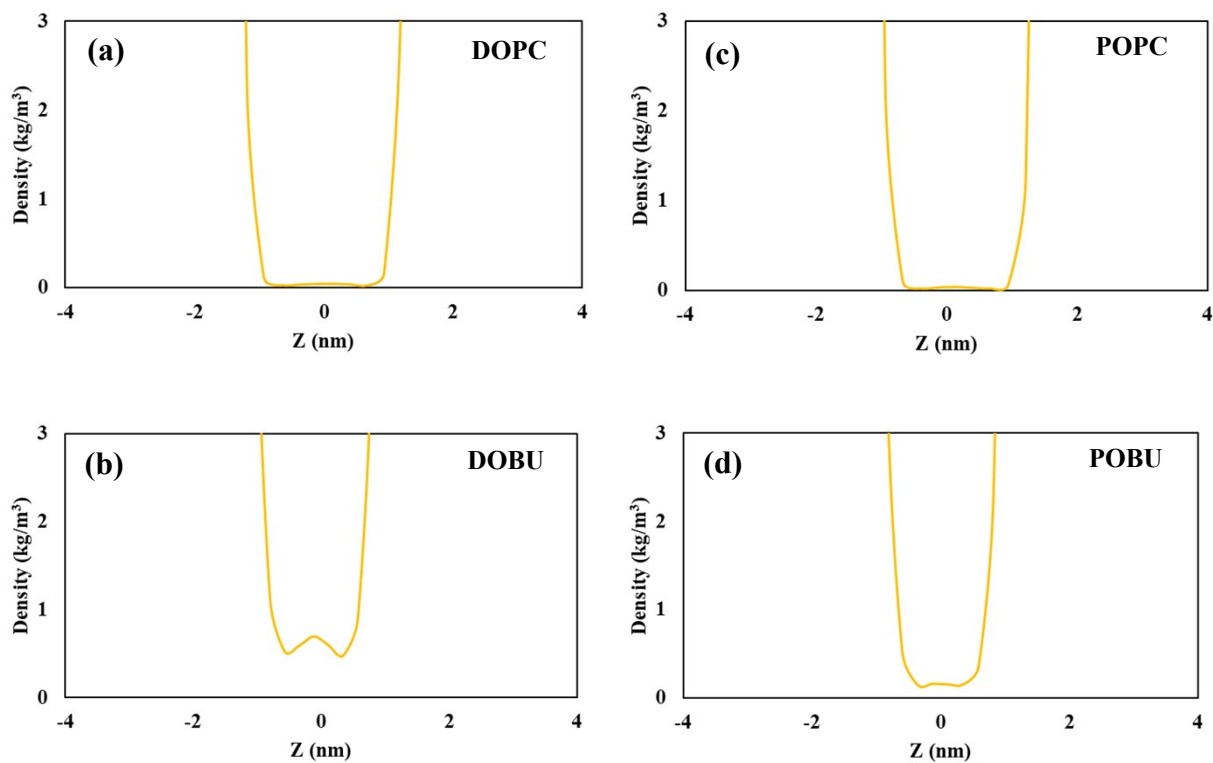

**Figure S3.** Enlarged density distribution profiles of water **(a-b)** for DOPC and its oxidized form (DOBU), **(c-d)** for POPC and its oxidized form (POBU) at pristine fullerene to lipid ratio of F/L =10/512.



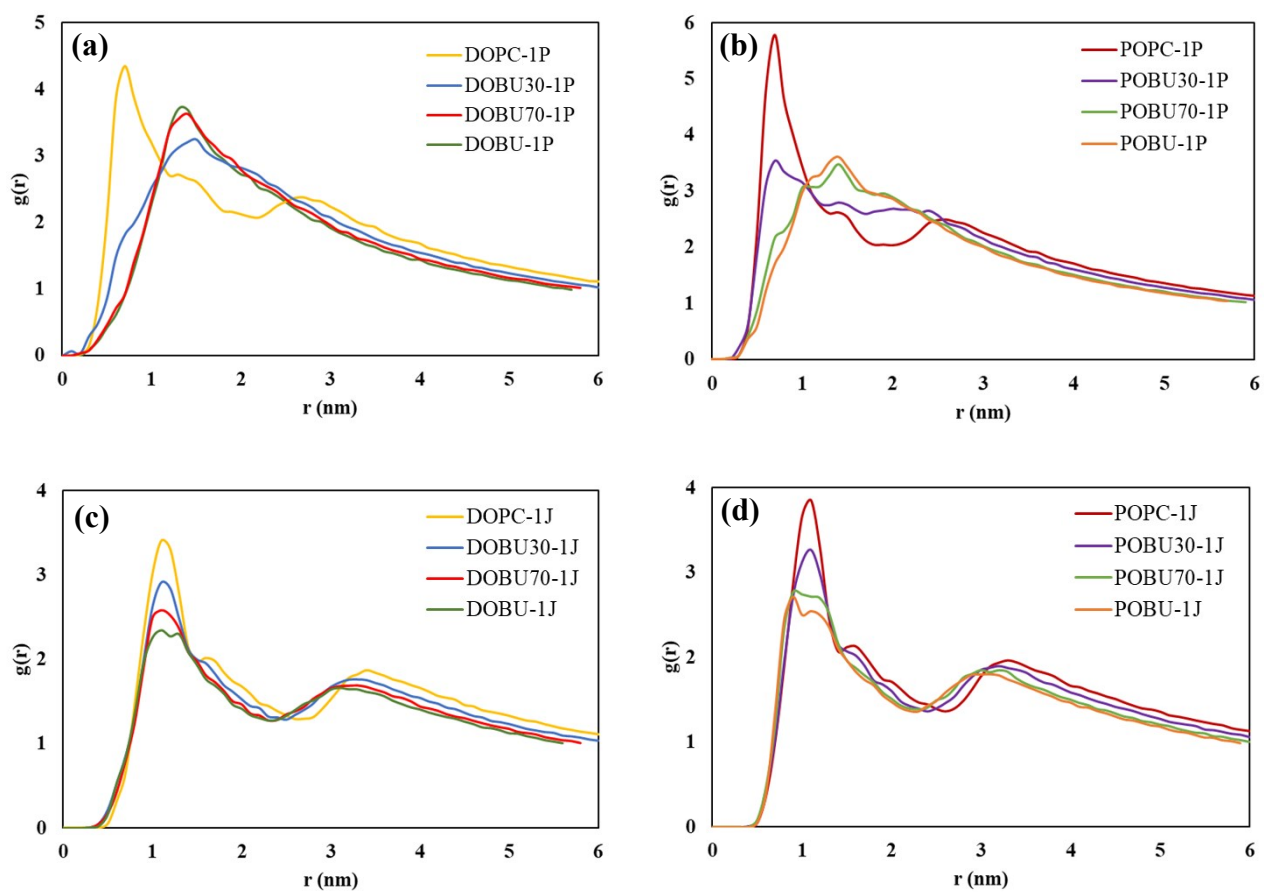

**Figure S4.** Membrane-Fullerene COM radial distribution functions for **(a-b)** pristine fullerenes, **(c-d)** janus fullerenes at fullerene-to-lipid ratio of 1/512.

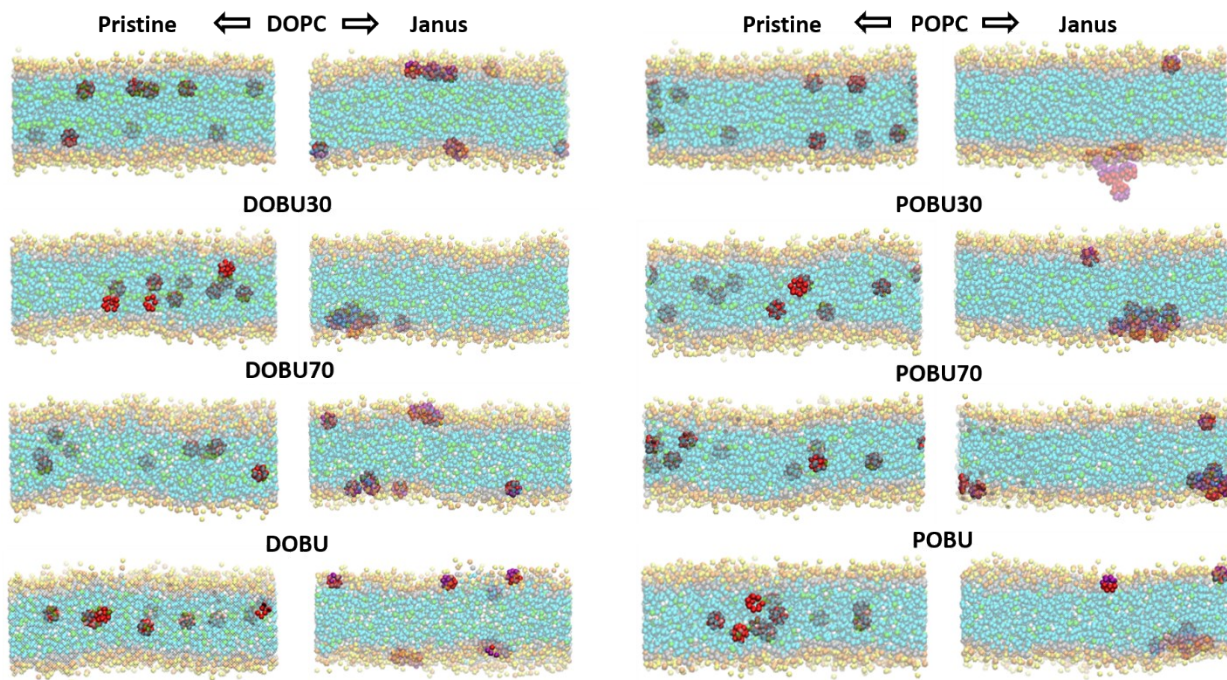

**Figure S5.** Last configurations (side view) obtained after 10  $\mu$ s simulation time at fullerene-to-lipid (F/L) ratio of 10/512.
